# Supplementary material for: Multifunctional theranostic carbazole-based cyanine for real-time imaging of amyloid-β and therapeutic treatment of multiple pathologies in Alzheimer's disease
Source: Royal Society of Chemistry journal article supplement (doi:10.1039/d3tb00082f), 2023-01-01
Supplement: d3tb00082f2.xlsx [file d3tb00082f2.xlsx]

## Sheet: Figure2
														WT			3×Tg			3×Tg+SLCOOH
													HT7	78.5469	60.2165	63.2155	77.5654	120.216	103.354	63.2157	67.2547	72.2156
													AT8	76.3525	89.3517	83.0321	91.6708	86.7925	122.794	116.872	106.899	101.2
													AT100	52.0656	60.2544	65.2652	90.2656	95.266	105.266	65.2654	78.2656	62.2156
													pS422	31.6942	71.1315	63.2224	94.7458	86.8644	118.39	39.6845	71.1023	45.8807

## Sheet: Figure S7
														WT			3×Tg			3×Tg+SLCOOH
													Aβ(40kDa)	5.01219	17.1813	32.8165	89.6932	101.472	108.918	92.5599	79.0092	79.9285
													Aβ(20kDa)	9.66925	30.4846	46.6239	98.8683	97.6204	103.517	77.8396	86.6431	93.7491
													APP	103.217	95.5417	80.2156	111.123	120.525	123.322	103.875	50.2165	60.1456
													Bace1	60.2135	60.5165	55.0542	50.5165	120.252	115.217	63.2555	150.211	120.215
														WT			3×Tg			3×Tg+SLCOOH
													Aβ(40kDa)	41.591	55.4942	52.5064	155.686	70.8758	73.4511	88.1303	60.4883	77.389
													Aβ(20kDa)	69.5532	98.446	83.954	140.682	72.7295	86.6164	120.037	136.701	105.936
													APP	103.217	95.5417	80.2156	111.123	120.525	123.322	103.875	50.2165	60.1456
													Bace1	60.2135	60.5165	55.0542	50.5165	120.252	115.217	63.2555	150.211	120.215

## Sheet: Figure S8
														WT			3×Tg			3×Tg+SLCOOH
													GSK3β	80.215	120.21	123.012	90.2135	120.312	100.213	96.2651	100.214	120.214
													p-GSK3β	120.212	100.215	110.214	80.2165	90.1566	70.2165	200.217	193.546	245.126
													PP2A	110.212	119.247	120.214	100.211	93.2165	106.21	87.2135	91.121	100.252
													p-PP2A	167.435	125.846	107.76	112.007	89.9337	98.1583	78.5678	71.4975	90.0028
														WT			3×Tg			3×Tg+SLCOOH
													GSK3β	120.152	100.213	70.2154	88.2156	120.547	80.1565	90.1265	80.2156	100.213
													p-GSK3β	123.155	110.546	123.252	90.2165	90.5154	110.215	208.179	300.256	155.212
													PP2A	120.213	130.213	120.213	99.5146	100.654	110.154	150.241	160.266	153.215
													p-PP2A	113.152	120.018	149.55	137.164	65.0039	97.8417	92.2546	92.928	102.157

## Sheet: Figure S9
														WT			3×Tg			3×Tg+SLCOOH
													LC3II/LC3I	29.2783	54.4388	59.8892	92.7421	94.0728	113.818	128.154	115.288	126.801
													Ubiqutin	74.7437	100.275	139.626	119.356	62.1837	118.486	121.313	97.5555	83.8366
														WT			3×Tg			3×Tg+SLCOOH
													LC3II/LC3I	41.5593	72.4572	106.072	144.315	97.7777	57.9996	95.1342	112.707	65.1311
													Ubiqutin	115.036	95.9527	73.6815	107.646	89.9797	102.384	96.4129	57.1805	57.8826

## Sheet: Figure S10
															WT			3×Tg			3×Tg+SLCOOH
														p-mTOR/mTOR	513.136	311.31	68.6549	143.076	89.7445	67.2086	197.736	313.479	461.271
														p-p70s6k/p70s6k	24.101	23.8928	48.8512	134.265	71.7726	94.1895	95.4274	129.145	204.039
														Beclin1	23.7097	55.022	55.0924	104.296	95.1707	100.535	79.4698	83.6322	94.9021
														p62	38.3966	49.2117	51.9219	80.2781	98.4784	121.265	81.2315	63.6434	57.4133
														catD	85.6773	71.3007	66.4276	71.6204	112.302	116.376	120.539	121.87	94.5683
															WT			3×Tg			3×Tg+SLCOOH
														p-mTOR/mTOR	66.093	57.8912	58.6196	55.8356	87.4153	150.793	200.375	302.695	181.463
														p-p70s6k/p70s6k	33.1172	32.355	38.4205	97.5194	72.5727	120.12	159.567	180.798	276.265
														Beclin1	151.623	126.396	67.7645	92.7409	105.038	102.256	83.9497	87.6498	115.345
														p62	101.368	69.9189	85.732	102.325	109.116	88.9611	113.959	129.59	125.73
														catD	40.5636	65.0976	54.0649	96.7663	87.714	115.523	114.266	102.503	105.041

## Sheet: Figure S11
														WT			3×Tg			3×Tg+SLCOOH
													PSD95	366.527	301.671	349.243	112.07	92.1089	96.3364	156.901	185.593	175.125
													synaptophysin	124.019	141.714	138.559	88.2896	88.7097	123.002	188.068	209.256	136.717
														WT			3×Tg			3×Tg+SLCOOH
													PSD95	113.286	117.868	98.2614	88.4655	108.066	79.1127	118.02	101.525	65.1311
													synaptophysin	258.647	132.812	180.505	105.705	97.8225	96.4818	192.724	176.353	169.123

## Sheet: Figure S12
															WT			3×Tg			3×Tg+SLCOOH
														p-CaMKII/CaMKII	400.563	301.777	180.074	79.8145	132.335	88.6205	959.252	873.632	1050.03
														p-Erk/Erk	152.773	148.379	147.984	103.041	81.3761	115.607	144.073	178.161	203.106
														p-CREB/CREB	183.854	147.1	95.5955	105.623	109.044	85.3625	130.957	153.429	126.173
															WT			3×Tg			3×Tg+SLCOOH
														p-CaMKII/CaMKII	190.913	149.823	189.891	62.8386	67.8864	139.523	262.212	355.003	190.827
														p-Erk/Erk	63.1951	104.773	96.6321	104.495	91.5082	104.01	90.9056	70.0846	81.6296
														p-CREB/CREB	30.8473	36.6881	80.0898	167.701	40.6661	91.7122	132.764	119.922	104.523

## Sheet: Figure S13
															WT			3×Tg			3×Tg+SLCOOH
														NMDAR2A	108.919	38.5457	32.1634	53.2998	112.918	141.857	143.776	197.233	228.832
														p-NMDAR2A	150.213	120.133	100.326	80.2165	80.035	110.033	50.3266	90.1562	130.033
														NMDAR2B	110.033	115.261	100.321	190.266	170.316	180.156	70.2165	80.1265	100.217
														p-NMDAR2B	60.2165	70.1265	90.2515	120.063	130.327	160.522	120.214	110.313	80.2365
															WT			3×Tg			3×Tg+SLCOOH
														NMDAR2A	90.4973	75.0258	86.9245	80.2353	100.636	110.742	90.7532	115.439	120.461
														p-NMDAR2A	95.2326	100.237	86.2357	80.266	103.264	109.353	91.3156	120.217	120.217
														NMDAR2B	100.214	130.032	120.032	110.323	100.326	95.1217	95.2522	96.2653	100.656
														p-NMDAR2B	30.0326	90.2161	93.2156	100.216	80.0126	90.2154	40.2156	90.5217	30.2165
